# Supplementary material for: Diversity of Prdm9 Zinc Finger Array in Wild Mice Unravels New Facets of the Evolutionary Turnover of this Coding Minisatellite
Source: PubMed Central journal article supplement (PMC3890296; doi:10.1371/journal.pone.0085021), 2014-01-13

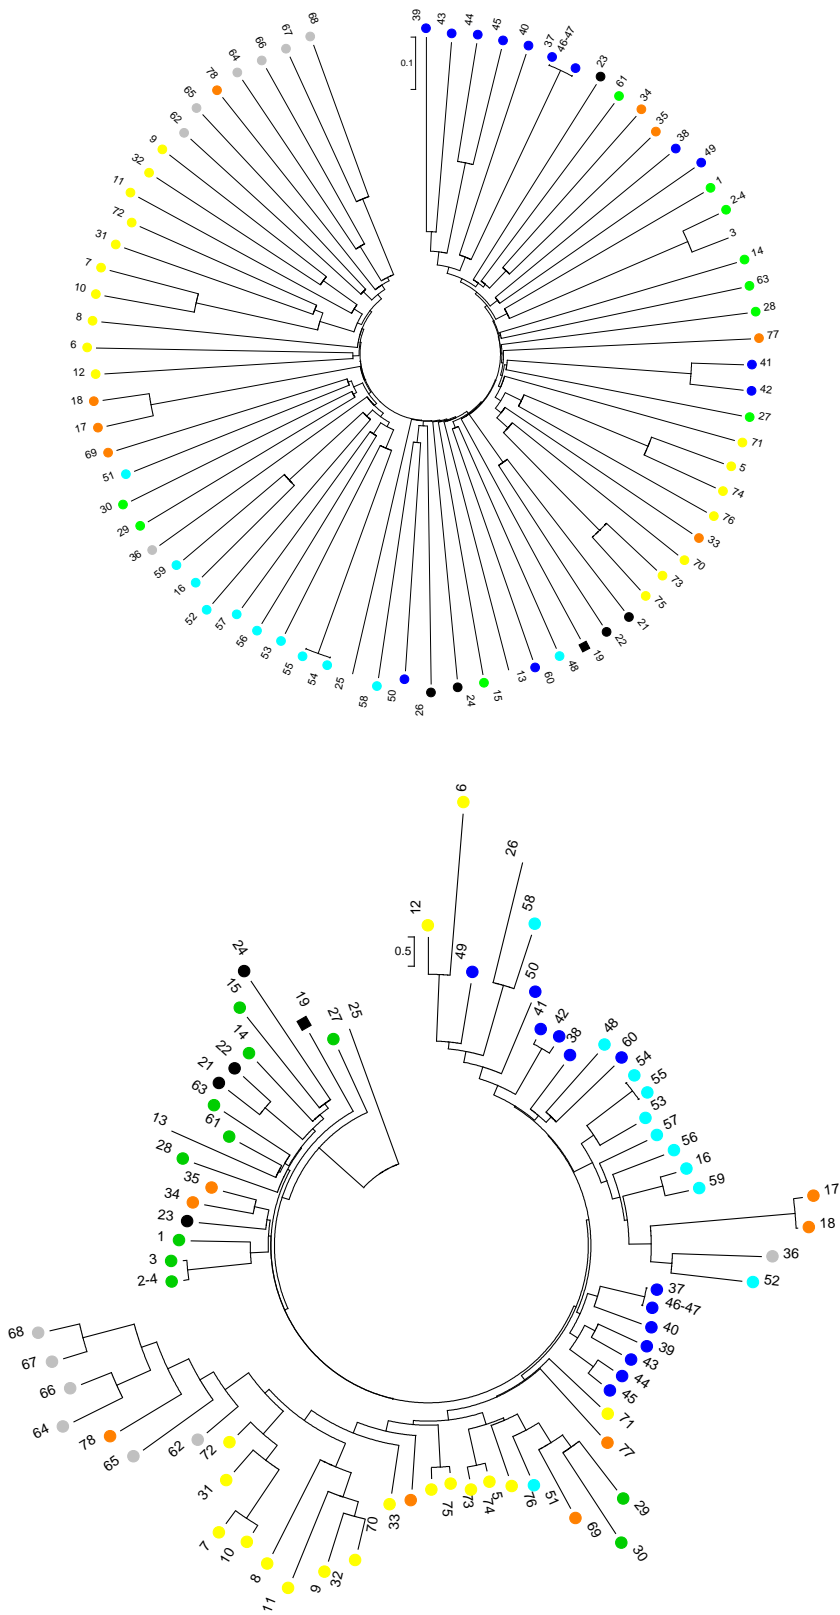

Supplement: pone.0085021.s004.pdf [file pone.0085021.s004.pdf]
