# Supplementary material for: Diversity of Prdm9 Zinc Finger Array in Wild Mice Unravels New Facets of the Evolutionary Turnover of this Coding Minisatellite
Source: PLoS One. 2014 Jan 13;9(1):e85021. doi: 10.1371/journal.pone.0085021 (PMC3890296; doi:10.1371/journal.pone.0085021)
Supplement: Table S2 — Samples used for genotyping. (XLSX) [file pone.0085021.s006.xlsx]

## Sheet: sample_list
Taxon	specimen_ID	Lab_Strain	Locality	Country	country_code	NbZnF1	Nb_ZnF2	DNA_allele_ID1	DNA_allele_ID2
Mus caroli	17731	KTK	Khorat	Thailand		11	11
Mus caroli	17676	KTH	Thailand	Thailand		11	11
Mus cervicolor	18115	CRV	Chon-Buri	Thailand	THAI	8	11	26
Mus cypriacus	17399		Pachni	Cyprus		11	14
Mus cypriacus	17396		Potamiou	Cyprus		13	15
Mus cypriacus	17369		Pyrgos	Cyprus		11	13
Mus famulus	17675	FAM	Kotagiri	India	INDI	11	11	13
Mus macedonicus macedonicus	7411	XBB	Bania	Bulgaria	BULG	9	10	66	68
Mus macedonicus macedonicus	18216	XBJ	Jitarovo	Bulgaria	BULG	9	10	67
Mus macedonicus macedonicus	17666	XBS	Slantchev-Briag	Bulgaria	BULG	10	13	62	67
Mus macedonicus macedonicus	10471		Alazani	Georgia		14	14
Mus macedonicus macedonicus	18764		Hamadan	Iran		11	12
Mus macedonicus macedonicus	18760		Hamadan	Iran		11	12
Mus macedonicus spretoides	16750		Carmel	Israel	ISRA	10	11	36
Mus macedonicus spretoides	16656		Carmel	Israel		11	11
Mus musculus castaneus	13386		Bikaner	India	INDI	10	13	14
Mus musculus castaneus	13384		Bikaner	India		11	11
Mus musculus castaneus	13385		Bikaner	India		10	12
Mus musculus castaneus	17741	DHA	Delhi	India	INDI	10	11	11
Mus musculus castaneus	9834		Delhi	India		10	11
Mus musculus castaneus	9846		Delhi	India		11	13
Mus musculus castaneus	9837		Delhi	India		10	11
Mus musculus castaneus	9829		Delhi	India		13	13
Mus musculus castaneus	9841		Delhi	India		11	13
Mus musculus castaneus	16076		Gauhati	India		14	14
Mus musculus castaneus	16078		Jalandhar	India		11	15
Mus musculus castaneus	10667		Masinagudi	India		11	13
Mus musculus castaneus	10663		Masinagudi	India		12	12
Mus musculus castaneus	17747	CIM	Nilgiri	India	INDI	11	11	9
Mus musculus castaneus	16075		Pachmarhi	India		14	14
Mus musculus castaneus	16082		Punjab	India		11	15
Mus musculus castaneus	16083		Punjab	India		12	12
Mus musculus castaneus	16077		Varanasi	India	INDI	7	12	6	61
Mus musculus castaneus	19003		Asadabad	Iran		10	11
Mus musculus castaneus	18994		Asadabad	Iran		11	12
Mus musculus castaneus	18978		Asadabad	Iran		11	11
Mus musculus castaneus	18982		Bampour	Iran	IRAN	11	12	9
Mus musculus castaneus	19067		Bandar-Abbas	Iran	IRAN	10	10	1
Mus musculus castaneus	18792		DowlatAbad	Iran		11	11
Mus musculus castaneus	18750		Hamadan	Iran		13	13
Mus musculus castaneus	18975		Iranchahr	Iran	IRAN	10	10	30
Mus musculus castaneus	18993		Iranchahr	Iran	IRAN	10	11	9	30
Mus musculus castaneus	18973		Iranchahr	Iran		11	11
Mus musculus castaneus	18971		Iranchahr	Iran		12	12
Mus musculus castaneus	18969		Iranchahr	Iran		12	12
Mus musculus castaneus	18977		Iranchahr	Iran		11	11
Mus musculus castaneus	18793		Isfahan	Iran	IRAN	10	12	12
Mus musculus castaneus	19063		Kombaki	Iran		12	12
Mus musculus castaneus	18768		MahmoudAbad	Iran		11	11
Mus musculus castaneus	20735		Mehriz	Iran	IRAN	10	10	15
Mus musculus castaneus	18776		Montazeri	Iran	IRAN	10	12	38	63
Mus musculus castaneus	19043		Negur	Iran	IRAN	11	12	52
Mus musculus castaneus	19038		Negur	Iran		11	12
Mus musculus castaneus	19062		Nikshahr	Iran	IRAN	12	16	31	32
Mus musculus castaneus	19057		Nikshahr	Iran		12	12
Mus musculus castaneus	19034		NowBandian	Iran		12	12
Mus musculus castaneus	19032		NowBandian	Iran		12	12
Mus musculus castaneus	19010		Rikapout	Iran		11	12
Mus musculus castaneus	16695		Shirvan	Iran	IRAN	10	15	35
Mus musculus castaneus	19016		Tchabahar	Iran		12	12
Mus musculus castaneus	19014		Tchabahar	Iran		11	12
Mus musculus castaneus	19020		Tchabahar	Iran		12	12
Mus musculus castaneus	10649		Teheran	Iran		14	15
Mus musculus castaneus	17737	TEH	Tehran	Iran	IRAN	11	11	9
Mus musculus castaneus	17299		Zabol	Iran	IRAN	13	13	69
Mus musculus castaneus	17735	DKN	Kenya	Kenya	KENY	10	13	8
Mus musculus castaneus	CAST/EiJ	CAST/EiJ	Laboratory	Laboratory	LAB			9
Mus musculus castaneus	10355		Angah	Pakistan		10	14
Mus musculus castaneus	10354		Angah	Pakistan		11	12
Mus musculus castaneus	10353		Angah	Pakistan		11	12
Mus musculus castaneus	10356		Gujarkhan	Pakistan		12	12
Mus musculus castaneus	10364		Islamabad	Pakistan	PAKI	12	14	29	70
Mus musculus castaneus	10363		Islamabad	Pakistan		11	13
Mus musculus castaneus	10361		Islamabad	Pakistan		10	10
Mus musculus castaneus	17742	MPR	Rawalpindi	Pakistan	PAKI	10	11	78
Mus musculus castaneus	10342		Rawalpindi	Pakistan		11	11
Mus musculus castaneus	10338		Rawalpindi	Pakistan		11	11
Mus musculus castaneus	10351		Tamasapabad	Pakistan		10	10
Mus musculus castaneus	10348		Tamasapabad	Pakistan		12	13
Mus musculus castaneus	10349		Tamasapabad	Pakistan		11	12
Mus musculus castaneus	19181	CTA	He-Mei	Taiwan	TAIW	11	11	9
Mus musculus castaneus	16643		He-Mei	Taiwan		15	15
Mus musculus castaneus	16645		He-Mei	Taiwan		12	12
Mus musculus castaneus	17748	CTP	Pathumthani	Thailand	THAI	14	14	33
Mus musculus castaneus	16147		Pathumthani	Thailand		15	15
Mus musculus castaneus	17779	CAS	Thailand	Thailand	THAI	11	14	9
Mus musculus domesticus	17733	BZO	Oran	Algeria	ALGE	11	11	54
Mus musculus domesticus	20462		Zeralda	Algeria		11	11
Mus musculus domesticus	19227		Clervaux	Belgium	BELG	13	13	46
Mus musculus domesticus	19206		Monstreux	Belgium		11	13
Mus musculus domesticus	19212		Perwez	Belgium	BELG	11	13	50
Mus musculus domesticus	19208		Petit-sart	Belgium	BELG	11	14	18	42
Mus musculus domesticus	19248		Rouveroy	Belgium	BELG	11	13	47
Mus musculus domesticus	18223	DBP	Pomorie	Bulgaria	BULG	11	12	4	59
Mus musculus domesticus	7626		Vlas	Bulgaria	BULG	17	17	56
Mus musculus domesticus	17386		Akrotiri	Cyprus		11	11
Mus musculus domesticus	17333		Lemesos	Cyprus		11	12
Mus musculus domesticus	17353		Paphos	Cyprus		11	13
Mus musculus domesticus	17371		Pyrgos	Cyprus		12	12
Mus musculus domesticus	17755	DDO	Oedis	Denmark		12	13
Mus musculus domesticus	17777	BNC	Cairo	Egypt	EGYP	11	11	53
Mus musculus domesticus	5785		Aix-en-Provence	France		11	13
Mus musculus domesticus	17784		Annemasse	France	FRAN	13	13	46
Mus musculus domesticus	9456		Boofsheim	France		11	13
Mus musculus domesticus	7185		Boofsheim	France		13	14
Mus musculus domesticus	18126		Buzeins	France		12	13
Mus musculus domesticus	7564	DFC	Corsica	France	FRAN	11	13	40	55
Mus musculus domesticus	18222	DFG	Grau-du-Roi	France		11	11
Mus musculus domesticus	18138		lesColombiers	France		11	12
Mus musculus domesticus	18165		Montpeyroux	France	FRAN	11	11	2
Mus musculus domesticus	18161		Pomayrols	France		11	13
Mus musculus domesticus	7187		Saasenheim	France		11	11
Mus musculus domesticus	9451		Sand	France		13	14
Mus musculus domesticus	17783	DOT	Tahiti	French Polynesia	FRPO	12	12	16
Mus musculus domesticus	17743	DGA	Batumi	Georgia	GEOR	13	13	37
Mus musculus domesticus	10952		Helvachauri	Georgia		14	14
Mus musculus domesticus	19174		Ellingstedt	Germany		12	14
Mus musculus domesticus	7861		GachenBach	Germany		14	15
Mus musculus domesticus	19164		Havertofloit	Germany	GERM	12	12	45
Mus musculus domesticus	19166		Klappholz	Germany	GERM	12	12	45
Mus musculus domesticus	18157		Konstanz	Germany		11	12
Mus musculus domesticus	7853		Leipheim	Germany		14	14
Mus musculus domesticus	19176		Norstedt	Germany		13	14
Mus musculus domesticus	7850		Rischgam	Germany		13	13
Mus musculus domesticus	19168		Sollerup	Germany		11	13
Mus musculus domesticus	17812	2788	Straas	Germany	GERM	12	12	43
Mus musculus domesticus	17810	2705	Straas	Germany	GERM	12	12	43
Mus musculus domesticus	19175		Tarpfeldt	Germany		12	14
Mus musculus domesticus	7608	DGD	Doirani	Greece		11	11
Mus musculus domesticus	18807		Ahvaz	Iran	IRAN	12	13	44
Mus musculus domesticus	18755		Hamadan	Iran	IRAN	9	11	49
Mus musculus domesticus	18225	BIA	Afula	Israel	ISRA	11	11	4
Mus musculus domesticus	17668	BIK	Kefar-Ahim	Israel	ISRA	11	11	54
Mus musculus domesticus	17734	DIK	Keshet	Israel	ISRA	11	11	3
Mus musculus domesticus	16692		Keshet	Israel		11	11
Mus musculus domesticus	16746		Ortal	Israel		12	12
Mus musculus domesticus	17772	BIB/A	Sede-Boger	Israel	ISRA	11	11	54
Mus musculus domesticus	17771	BIB/b	Sede-Boger	Israel	ISRA	11	16	54	57
Mus musculus domesticus	7463		Bregano	Italy		12	13
Mus musculus domesticus	17785	24CI	Cislago	Italy	ITAL	13	13	46
Mus musculus domesticus	10435		Crano	Italy		10	10
Mus musculus domesticus	17657	DJO	Orcetto	Italy	ITAL	13	13	46
Mus musculus domesticus	C57/Bl6	C57/Bl6	Laboratory	Laboratory	LAB			45
Mus musculus domesticus	WSB	WSB	Laboratory	Laboratory	LAB			46
Mus musculus domesticus	19127		Edde	Lebanon		11	11
Mus musculus domesticus	19135		Hbeline	Lebanon		11	11
Mus musculus domesticus	19679		Terbol	Lebanon		11	13
Mus musculus domesticus	9874		Azemmour	Morocco		11	13
Mus musculus domesticus	17736	DMZ	Azemmour	Morocco		11	11
Mus musculus domesticus	9858		Khemisset	Morocco		11	11
Mus musculus domesticus	9933		Tanant	Morocco		11	13
Mus musculus domesticus	17768	DSD	Dakar	Senegal	SENE	13	13	46
Mus musculus domesticus	17658	DEB	Barcelona	Spain	SPAI	10	12	48
Mus musculus domesticus	10275		Calavera	Spain		11	13
Mus musculus domesticus	17764	BEC	Calonge	Spain		11	11
Mus musculus domesticus	10268		Cubillos	Spain		12	12
Mus musculus domesticus	17770	BEM	Menorca	Spain	SPAI	8	13	46	58
Mus musculus domesticus	7690	BEP	Palma-de-Mallorca	Spain	SPAI	11	11	54
Mus musculus domesticus	18156		Basel	Switzerland		11	11
Mus musculus domesticus	18155		Bern	Switzerland		12	12
Mus musculus domesticus	7262		Bembla	Tunisia	TUNI	12	12	39
Mus musculus domesticus	7252		Djemmal	Tunisia	TUNI	11	13	46	51
Mus musculus domesticus	7258		KsarH	Tunisia		13	13
Mus musculus domesticus	7221		Lamta	Tunisia		11	12
Mus musculus domesticus	9337		Mahdia	Tunisia		11	11
Mus musculus domesticus	17769	22MO	Monastir	Tunisia	TUNI	13	13	77
Mus musculus domesticus	13388		VanLac	Turkey	TURK	10	10	60
Mus musculus domesticus	13389		VanLac	Turkey		12	12
Mus musculus domesticus	7622	CALIF	California	United States	USA	13	13	46
Mus musculus domesticus	7725	PAC	Pensylvania	United States	USA	12	12	45
Mus musculus molossinus	7408	MOL	Mishima	Japan	JAPA	14	14	74
Mus musculus molossinus	MOLF/EiJ	MOLF/EiJ	Laboratory	Laboratory	LAB			76
Mus musculus molossinus	WM7	WM7	Laboratory	Laboratory	LAB			9
Mus musculus musculus	10329		Meghri	Armenia		14	14
Mus musculus musculus	17744	MAM	Meghri	Armenia	ARME	11	12	28
Mus musculus musculus	10334		Meghri	Armenia		12	13
Mus musculus musculus	10320		Meghri	Armenia		12	12
Mus musculus musculus	17669	MAI	Illmitz	Austria	AUST	11	11	7
Mus musculus musculus	7655	MBB	Bania	Bulgaria	BULG	16	16	27
Mus musculus musculus	17670	MBT	General-Toshevo	Bulgaria	BULG	14	14	72
Mus musculus musculus	18176	MBK	Kranevo	Bulgaria		16	16
Mus musculus musculus	17659	MBS	Sokolovo	Bulgaria	BULG	12	12	39
Mus musculus musculus	16657		Fuhai	China		15	15
Mus musculus musculus	16072		Gansu	China		14	15
Mus musculus musculus	20303		Narati	China		14	15
Mus musculus musculus	17514		Xiji	China		13	13
Mus musculus musculus	17792		Děpoltovice	Czech Republic		15	15
Mus musculus musculus	17793		H.Slavkov	Czech Republic		11	11
Mus musculus musculus	17797		Počerny	Czech Republic		12	15
Mus musculus musculus	17821	2814	Studenec	Czech Republic	CZEC	14	14	73
Mus musculus musculus	17820		Studenec	Czech Republic	CZEC	14	14	73
Mus musculus musculus	17660	MDH	Hov	Denmark	DENM	14	14	73
Mus musculus musculus	17776	MDL	Loesning	Denmark	DENM	11	14	41
Mus musculus musculus	10950		Abkhasia	Georgia		12	12
Mus musculus musculus	17745	MGA	Alazani	Georgia	GEOR	10	10	38
Mus musculus musculus	10512		Chiracskaya	Georgia		11	11
Mus musculus musculus	10502		DidichChiraki	Georgia		12	12
Mus musculus musculus	10500		DidichChiraki	Georgia		11	13
Mus musculus musculus	10549		Gardabani	Georgia		11	14
Mus musculus musculus	10546		Gardabani	Georgia		11	14
Mus musculus musculus	10553		Gori	Georgia	GEOR	11	14	5
Mus musculus musculus	10556		Gori	Georgia		11	14
Mus musculus musculus	10523		Karelifosse	Georgia		9	11
Mus musculus musculus	10527		LacLissi	Georgia		13	13
Mus musculus musculus	10575		Lagodekhi	Georgia		11	11
Mus musculus musculus	10570		Lagodekhi	Georgia		11	12
Mus musculus musculus	10582		Lissivillage	Georgia		12	12
Mus musculus musculus	10578		Lissivillage	Georgia		13	13
Mus musculus musculus	10296		Tbilissi	Georgia		12	12
Mus musculus musculus	10294		Tbilissi	Georgia		12	12
Mus musculus musculus	10290		Tsodoreti	Georgia		12	13
Mus musculus musculus	10577		Vashlavan	Georgia	GEOR	11	11	71
Mus musculus musculus	10501		Vashlavan	Georgia		11	11
Mus musculus musculus	17738	BID	Birdjand	Iran		13	13
Mus musculus musculus	17305		Dargaz	Iran		10	13
Mus musculus musculus	17293		Gonabad	Iran		13	14
Mus musculus musculus	17295		Gonabad	Iran		15	15
Mus musculus musculus	17740	KAK	Khakhk	Iran		13	13
Mus musculus musculus	17304		Khezri	Iran		11	13
Mus musculus musculus	17300		Khezri	Iran		11	11
Mus musculus musculus	17739	MAC	Mashad	Iran		10	10
Mus musculus musculus	16694		Sarakhs	Iran	IRAN	11	11	10
Mus musculus musculus	16698		Shirvan	Iran	IRAN	10	11	34
Mus musculus musculus	PWD/PhJ	PWD/PhJ	Laboratory	Laboratory	LAB			73
Mus musculus musculus	10297		Riga	Latvia		14	14
Mus musculus musculus	10298		Riga	Latvia		14	14
Mus musculus musculus	10299		Vilnius	Lithuania		14	14
Mus musculus musculus	17746	MPB	Bialowieza	Poland	POLA	14	14	75
Mus musculus musculus	10595		Bialowieza	Poland		14	14
Mus musculus musculus	10592		Bialowieza	Poland		14	14
Mus musculus musculus	6300		Urwitalt	Poland		13	15
Mus musculus musculus	17778	MPW	Warsaw	Poland	POLA	12	14	39
Mus musculus musculus	6312		Warsaw	Poland		13	13
Mus musculus musculus	6314		Warsaw	Poland		12	14
Mus musculus musculus	10321		Moscow	Russia		12	12
Mus musculus musculus	10305		Moscow	Russia		14	14
Mus musculus musculus	10303		Moscow	Russia		14	14
Mus musculus musculus	7720		Belgrade	Serbia	SERB	14	14	73
Mus musculus musculus	18226	MYL	Ljubljana	Slovenia	SLOV	14	14	73
Mus musculus musculus	12557		Badhyz	Turkmenistan	TURM	11	11	17
Mus musculus spp.	16101		Antananarivo	Madagascar		13	13
Mus musculus spp.	16095		Manakasina	Madagascar		12	12
Mus musculus spp.	17313		IledeUmsht	Qatar		13	13
Mus musculus spp.	17314		IledeUmsht	Qatar		13	13
Mus pahari	18117	PAH	Tak	Thailand		13	13
Mus Pyromys platythrix	18119	PTX	Mysore	India	INDI	13	15	25
Mus spicilegus	19262	ZYD	Debeljaca	Serbia	SERB	8	8	64
Mus spicilegus	17667	ZRU	Ukrainia	Ukrainia	UKRA	10	10	65
Mus spretus	17662	SFM	Montpellier	France	FRAN	9	9	23
Mus spretus	17663	SMZ	Azemmour	Morocco	MORO	2	9	19	20
Mus spretus	10065		Tanant	Morocco		11	11
Mus spretus	17665	SEB	Barcelona	Spain	SPAI	13	13	22
Mus spretus	17661	SEG	Granada	Spain	SPAI	13	13	21
Mus spretus	18220	SEI	Ibiza	Spain	SPAI	9	9	24
Mus spretus	17664	STF	Fondouk-Djedid	Tunisia	TUNI	13	13	22
Mus spretus	16066		MSaken	Tunisia		9	10
