# Supplementary material for: Diversity of Prdm9 Zinc Finger Array in Wild Mice Unravels New Facets of the Evolutionary Turnover of this Coding Minisatellite
Source: PLoS One. 2014 Jan 13;9(1):e85021. doi: 10.1371/journal.pone.0085021 (PMC3890296; doi:10.1371/journal.pone.0085021)
Supplement: Table S3 — Longest common stretches of ZnF variants in each group of alleles as defined by the phylogenetic trees of Figs. 2 and 3. (XLSX) [file pone.0085021.s007.xlsx]

## Sheet: longest_words
sequence group	max word length	nb of sequences	common word	nb occurrences
dark blue	4	14	AVQ-A	25
dark blue	4	14	K-QDQ	17
dark blue	4	14	K-QVK	19
dark blue	4	14	QHQ-Q	16
dark blue	4	14	Q-QNK	14
dark blue	4	14	QVK-Q	14
light blue	6	11	QHQ-QDK	20
green	4	12	Q-QDK	16
green	4	12	K-VVQ	19
orange	4	8	K-QDQ	8
yellow	6	17	QNK-QDQ	17
macedonicus-spicilegus	6	7	QNQ-ANK	7
spretus	2	5	KQ	7
spretus	2	5	KV	6
spretus	2	5	QQ	6
